# Supplementary material for: Sustained Yield Forestry in Sweden and Russia: How Does it Correspond to Sustainable Forest Management Policy?
Source: PubMed Central journal article supplement (PMC3593033; doi:10.1007/s13280-012-0370-6), 2013-03-10
Supplement: 13280_2012_370_MOESM1_ESM.pdf [file 13280_2012_370_MOESM1_ESM.pdf]

## **Electronic Supplementary Material**

**Sustained yield forestry in Sweden and Russia: How does it correspond to sustainable forest management policy?**

Marine Elbakidze, Kjell Andersson, Per Angelstam, Glen W. Armstrong, Robert Axelsson, Frederik Doyon, Martin Hermansson, Jonas Jacobsson, Yuriy Pautov

**Table S1** Formulas for calculation of annual allowable cut in the Russian Federation according to the regulation of the Federal Agency of Forestry from 2011

|                                                                                                                                                  | Formula for calculation of annual allowable cut:                            |                                               |
|--------------------------------------------------------------------------------------------------------------------------------------------------|-----------------------------------------------------------------------------|-----------------------------------------------|
|                                                                                                                                                  | By area, ha                                                                 | By volume, m <sup>3</sup><br>ha <sup>-1</sup> |
| <u>Even-age</u> is used when forests have relatively even distribution of forest stands and timber resources in different age classes            | $L_p = F/U$                                                                 | $V_p = L_p V_{m+ov}$                          |
| The first age is used when forests have depleted wood stock in mature and over-mature forest stands (less than 20% from the total growing stock) | $L_1 = F_{pm} + F_{m+om}/2K$                                                | $V_1 = L_1 V_{m+ov}$                          |
| <u>The second age</u> is used when the wood stock of mature and over mature forest stands correspond to more than 50% of the total growing stock | $L_2 = F_{md} + F_{pm} + F_{m+om}/2K$                                       | $V_2 = L_2 V_{m+ov}$                          |
| <u>Integral</u> is used in the same cases as the previous one (the second age)                                                                   | $L_{int} = (0.2F_y + 0.6F_m + F_m^2 + 1.4F_{pm} + 1.8F_{m+ov}) \times 0.01$ | $V_{int} = L_{int} V_{m+ov}$                  |

F – the total area of forests used for wood production; U – age of final felling; F<sub>y</sub> – an area of young forests; F<sub>md</sub> – an area of middle age forests; F<sub>pm</sub> – an area of pre-mature forests; F<sub>m</sub> – an area of mature forests; F<sub>ov</sub> – an area of over mature forests; K – a duration of age class in years; V<sub>m+ov</sub> – mean volume of wood per hectare in mature and over-mature forests.
